# Supplementary material for: Transnuclear mice reveal Peyer's patch iNKT cells that regulate B‐cell class switching to IgG1
Source: PubMed Central journal article supplement (PMC6627243; doi:10.15252/embj.2018101260), 2019-05-31
Supplement: EMBJ-38-e101260-s001.pdf [file EMBJ-38-e101260-s001.pdf]

## Appendix

### Table of contents:

Figure legend and reference  
Figure S1

Page 1  
Page 2

**Figure S1. PP-NKT are not enriched for gene signatures consistent with NKT0, NKT1, NKT2, NKT17, or adipose NKT cells.** (A) Expression levels of signature genes associated with the indicated NKT subsets. FPKM values are from bulk RNAseq of sorted spleen or PP-NKT populations from  $V\alpha 14$  TN mice. Values are means of 3 biological replicates; error bars are SEM. (B) Heatmap showing expression of gene sets associated with NKT0, NKT1, NKT2, or NKT17 cells as reported in (Engel, Seumois et al., 2016).

### Reference:

Engel I, Seumois G, Chavez L, Samaniego-Castruita D, White B, Chawla A, Mock D, Vijayanand P, Kronenberg M (2016) Innate-like functions of natural killer T cell subsets result from highly divergent gene programs. *Nat Immunol* 17: 728-39



**B**

|           | spleen NKT |       |       | PP-NKT |       |       |
|-----------|------------|-------|-------|--------|-------|-------|
| Nkg7      | 879.6      | 1167  | 886.1 | 1281   | 1504  | 1517  |
| Klrd1     | 80.7       | 86.8  | 73.0  | 43.4   | 56.9  | 48.1  |
| Ifitm10   | 7.8        | 10.0  | 8.2   | 5.4    | 4.9   | 3.0   |
| Ly6c2     | 377.0      | 305.8 | 303.1 | 140.9  | 117.1 | 128.6 |
| Klrb1c    | 106.7      | 150.2 | 129.4 | 84.4   | 121.5 | 74.2  |
| Klrrk1    | 63.7       | 70.0  | 65.3  | 26.5   | 23.3  | 14.9  |
| Xcl1      | 110.6      | 119.3 | 113.8 | 113.9  | 130.7 | 104.0 |
| Fasl      | 46.0       | 49.4  | 51.6  | 52.1   | 67.3  | 59.4  |
| Gzmb      | 14.6       | 7.4   | 4.5   | 46.1   | 61.0  | 211.2 |
| Cxcr3     | 287.8      | 321.5 | 330.6 | 245.2  | 308.2 | 233.7 |
| Gimap3    | 815.2      | 660.4 | 834.0 | 1091   | 1027  | 1148  |
| Klra3     | 7.9        | 10.6  | 8.0   | 2.6    | 4.4   | 1.4   |
| Ms4a4b    | 1349       | 1171  | 1098  | 1356   | 1160  | 1328  |
| Klra9     | 3.9        | 5.4   | 2.9   | 0.1    | 1.1   | 1.9   |
| AW112010  | 1359       | 1338  | 1274  | 1576   | 1655  | 1879  |
| Slamf7    | 20.4       | 24.7  | 23.7  | 16.4   | 22.3  | 12.7  |
| Klrc2     | 22.7       | 22.5  | 19.3  | 5.9    | 5.3   | 3.5   |
| Lrrk1     | 2.9        | 3.5   | 3.7   | 1.6    | 2.7   | 1.7   |
| H2-Q7     | 182.1      | 174.1 | 142.9 | 165.8  | 177.4 | 159.4 |
| Ii2rb     | 432.4      | 442.4 | 470.6 | 303.4  | 446.8 | 267.4 |
| Rgs1      | 36.4       | 37.1  | 37.2  | 63.2   | 85.3  | 61.7  |
| Fcer1g    | 66.7       | 66.9  | 56.9  | 29.3   | 30.6  | 41.7  |
| Hsd11b1   | 97.4       | 85.9  | 95.9  | 97.8   | 70.3  | 107.4 |
| H2-Q6     | 271.8      | 222.4 | 230.8 | 296.1  | 295.3 | 272.0 |
| Dopey2    | 6.9        | 6.1   | 6.4   | 4.0    | 6.0   | 4.3   |
| Stat4     | 84.2       | 78.5  | 89.6  | 101.8  | 115.9 | 92.5  |
| Fgl2      | 13.9       | 16.1  | 19.1  | 17.3   | 26.3  | 26.5  |
| Klre1     | 15.4       | 15.4  | 8.0   | 2.9    | 4.5   | 3.2   |
| Ctla2a    | 43.6       | 51.7  | 39.3  | 26.2   | 22.9  | 34.1  |
| Klra5     | 0.1        | 0.5   | 0.2   | 0.4    | 0.0   | 0.1   |
| Klrc1     | 96.3       | 124.7 | 92.5  | 23.5   | 24.5  | 10.6  |
| Dapk2     | 3.0        | 3.9   | 4.5   | 52.3   | 41.3  | 60.9  |
| Ppm1j     | 19.4       | 16.6  | 21.7  | 16.2   | 16.0  | 12.2  |
| Styk1     | 0.0        | 0.0   | 0.1   | 0.0    | 0.0   | 0.0   |
| Klra13-ps | 0.3        | 1.1   | 0.3   | 0.1    | 0.0   | 0.1   |
| Ii12rb2   | 15.1       | 16.0  | 15.8  | 10.8   | 16.3  | 8.7   |
| Itga1     | 0.9        | 1.2   | 0.9   | 2.5    | 3.0   | 1.9   |
| H2-K1     | 2351       | 1993  | 2142  | 2738   | 2382  | 2830  |
| Pik3ap1   | 11.7       | 14.3  | 14.9  | 10.2   | 16.3  | 6.7   |
| Klra8     | 0.5        | 0.6   | 0.3   | 0.0    | 0.0   | 0.0   |
| Klra6     | 1.2        | 0.7   | 0.6   | 0.4    | 0.0   | 0.6   |
| Klra14-ps | 0.3        | 0.0   | 0.1   | 0.0    | 0.0   | 0.0   |
| Gm8909    | 45.6       | 41.4  | 41.6  | 57.2   | 48.3  | 58.9  |
| Rps27     | 779.1      | 1091  | 618.1 | 285.7  | 477.3 | 543.5 |
| Klra10    | 0.5        | 0.6   | 0.7   | 0.2    | 0.2   | 0.1   |

  

|               | spleen NKT |       |       | PP-NKT |       |       |
|---------------|------------|-------|-------|--------|-------|-------|
| Plac8         | 307.6      | 269.4 | 229.6 | 684.4  | 857.2 | 917.9 |
| Phgdh         | 72.1       | 90.1  | 70.1  | 73.0   | 66.5  | 68.8  |
| Ii17rb        | 39.0       | 38.3  | 36.7  | 35.9   | 40.9  | 34.8  |
| 2810417H13Rik | 21.6       | 35.0  | 20.5  | 3.8    | 3.1   | 4.1   |
| Tesc          | 112.5      | 93.2  | 99.9  | 73.7   | 63.7  | 83.5  |
| Tyms          | 6.1        | 9.1   | 5.5   | 2.6    | 2.1   | 2.4   |
| Asf1b         | 31.7       | 45.4  | 31.1  | 15.2   | 11.4  | 15.2  |
| Anp32e        | 71.7       | 96.2  | 79.0  | 47.9   | 62.5  | 44.1  |
| Phf11b        | 171.8      | 95.5  | 114.2 | 204.0  | 152.3 | 159.6 |
| Ii4           | 46.8       | 48.7  | 50.4  | 40.4   | 48.3  | 43.3  |
| Psmg2         | 65.4       | 71.4  | 61.3  | 55.8   | 51.7  | 57.6  |
| Cenpa         | 38.9       | 43.7  | 33.3  | 19.0   | 14.2  | 18.4  |
| Drosha        | 8.1        | 10.2  | 10.0  | 6.2    | 8.9   | 8.8   |
| Zbtb16        | 20.9       | 22.2  | 22.3  | 14.0   | 18.8  | 11.4  |
| Tkt           | 83.0       | 94.6  | 80.2  | 101.2  | 82.5  | 93.0  |
| Rrm1          | 28.5       | 40.9  | 34.2  | 26.9   | 22.9  | 20.0  |
| Birc5         | 38.9       | 54.8  | 32.7  | 6.2    | 4.4   | 6.2   |
| Rrm2          | 45.9       | 61.3  | 41.3  | 8.3    | 7.0   | 9.2   |
| Cdca8         | 17.5       | 26.8  | 14.9  | 5.7    | 4.0   | 4.1   |
| Top2a         | 14.2       | 18.5  | 12.6  | 2.5    | 2.1   | 2.0   |
| Pmf1          | 44.7       | 50.7  | 40.8  | 38.2   | 32.4  | 44.9  |
| Impa2         | 15.7       | 17.8  | 13.1  | 11.6   | 8.8   | 15.9  |
| Ccnb2         | 25.5       | 31.9  | 19.6  | 3.6    | 3.0   | 2.2   |
| Ccnb1         | 14.6       | 18.1  | 10.5  | 2.7    | 2.1   | 3.0   |
| Cdk1          | 6.7        | 10.0  | 6.0   | 1.8    | 1.0   | 1.2   |
| Tacc3         | 16.2       | 19.4  | 13.0  | 6.4    | 5.6   | 7.2   |
| Igfbp4        | 243.4      | 175.8 | 203.7 | 270.2  | 197.2 | 296.2 |
| Tk1           | 11.9       | 14.5  | 8.6   | 2.4    | 2.2   | 1.4   |
| Racgap1       | 17.6       | 20.2  | 15.6  | 10.8   | 8.2   | 8.5   |
| Gmnn          | 24.2       | 22.6  | 16.2  | 14.2   | 13.7  | 9.7   |
| Dfna5         | 1.0        | 0.7   | 0.9   | 0.7    | 0.6   | 0.7   |
| Ncaph         | 8.2        | 13.7  | 8.5   | 2.5    | 2.3   | 2.5   |
| Aurkb         | 11.2       | 17.7  | 9.4   | 3.6    | 0.6   | 2.6   |
| Ccne1         | 7.7        | 9.0   | 5.9   | 3.7    | 2.4   | 1.7   |
| Hist1h2ae     | 32.9       | 43.4  | 25.2  | 3.6    | 2.9   | 4.5   |
| Chdh          | 5.8        | 9.4   | 8.5   | 4.5    | 7.4   | 4.3   |
| Fbln1         | 0.8        | 0.6   | 1.1   | 0.1    | 0.3   | 0.4   |

  

|               | spleen NKT |       |       | PP-NKT |       |       |
|---------------|------------|-------|-------|--------|-------|-------|
| Rorc          | 8.5        | 9.0   | 7.6   | 6.9    | 9.4   | 6.4   |
| Tmem176a      | 35.0       | 29.7  | 26.7  | 59.8   | 69.0  | 65.9  |
| Serpinb1a     | 17.2       | 20.8  | 15.9  | 45.0   | 34.7  | 46.6  |
| Blk           | 7.1        | 4.8   | 5.5   | 6.1    | 4.5   | 5.8   |
| Tmem176b      | 50.2       | 48.5  | 34.6  | 98.1   | 97.2  | 104.6 |
| Pxdc1         | 14.3       | 14.5  | 11.2  | 15.3   | 10.9  | 18.2  |
| S100a4        | 310.4      | 266.5 | 213.9 | 55.1   | 41.1  | 37.5  |
| Actn2         | 2.3        | 2.3   | 2.5   | 5.4    | 4.2   | 5.4   |
| Ii1r1         | 0.5        | 0.7   | 0.2   | 0.5    | 1.1   | 0.5   |
| Ii23r         | 2.5        | 4.3   | 2.1   | 8.1    | 5.2   | 6.0   |
| Ccr6          | 6.4        | 7.0   | 7.2   | 3.5    | 3.8   | 3.6   |
| 5430421N21Rik | 3.9        | 4.3   | 5.9   | 6.4    | 9.8   | 7.9   |
| Aqp3          | 14.1       | 25.0  | 20.1  | 19.4   | 23.9  | 16.7  |
| Sepp1         | 87.7       | 85.2  | 98.8  | 110.8  | 100.8 | 119.1 |
| Lrrc17        | 0.3        | 0.3   | 0.1   | 0.4    | 0.1   | 0.3   |
| Rub1          | 1.0        | 0.3   | 0.2   | 2.3    | 3.5   | 4.1   |
| Ii17re        | 3.7        | 6.6   | 2.6   | 3.6    | 3.4   | 6.5   |
| Cabin1        | 9.7        | 8.8   | 10.1  | 11.5   | 11.4  | 9.4   |
| Amica1        | 12.8       | 11.8  | 8.0   | 29.1   | 28.4  | 33.7  |
| Cd7           | 370.8      | 347.8 | 312.7 | 725.9  | 517.5 | 758.1 |
| Chad          | 2.5        | 2.9   | 3.7   | 7.4    | 8.9   | 7.9   |
| Apol7b        | 45.2       | 44.4  | 50.9  | 107.4  | 112.9 | 116.4 |
| Tnfrsf25      | 107.5      | 76.3  | 92.5  | 100.1  | 76.8  | 96.2  |
| Stab2         | 0.1        | 0.1   | 0.1   | 0.0    | 0.1   | 0.0   |
| Emb           | 198.7      | 176.1 | 181.5 | 259.9  | 230.0 | 293.4 |
| Sdc1          | 6.7        | 7.3   | 6.7   | 5.9    | 6.6   | 4.6   |
| Itgae         | 12.6       | 12.0  | 11.4  | 66.3   | 73.0  | 74.1  |
| Kcnk1         | 1.3        | 1.2   | 1.1   | 1.8    | 2.4   | 0.7   |
| Cxcr6         | 854        | 1003  | 996   | 846    | 849   | 856   |
| Avpi1         | 7.3        | 7.6   | 6.2   | 8.5    | 5.5   | 12.4  |
| Prelid2       | 4.5        | 7.3   | 5.5   | 5.6    | 9.9   | 10.0  |
| Ramp3         | 11.9       | 12.4  | 11.7  | 28.6   | 19.0  | 39.0  |
| Gpr114        | 31.7       | 35.2  | 29.6  | 56.3   | 70.8  | 65.4  |
| 5830411N06Rik | 26.2       | 31.7  | 22.5  | 23.7   | 24.1  | 24.5  |
| Plekhf1       | 17.5       | 20.0  | 18.4  | 22.4   | 29.3  | 18.6  |
| Abhd15        | 8.7        | 9.3   | 10.3  | 12.7   | 16.1  | 15.0  |
| Abi3bp        | 0.1        | 0.1   | 0.2   | 0.1    | 0.1   | 0.1   |
| 2310007L24Rik | 0.9        | 0.4   | 0.7   | 3.0    | 2.2   | 2.1   |
| Jag1          | 0.2        | 0.2   | 0.4   | 0.1    | 0.1   | 0.1   |
| Mycn          | 1.4        | 1.1   | 0.7   | 0.1    | 0.1   | 0.1   |
| Npl           | 0.8        | 0.2   | 0.6   | 0.4    | 0.7   | 1.6   |
| Rnf208        | 0.3        | 0.2   | 0.3   | 0.9    | 2.0   | 2.0   |
| Mmp25         | 1.1        | 0.6   | 1.3   | 1.1    | 1.4   | 0.5   |

  

|         | spleen NKT |       |       | PP-NKT |       |       |
|---------|------------|-------|-------|--------|-------|-------|
| Itm2a   | 21.7       | 30.1  | 26.0  | 32.5   | 24.2  | 25.7  |
| Ldhd    | 60.9       | 65.9  | 57.8  | 55.7   | 49.6  | 64.3  |
| Lef1    | 226.7      | 173.5 | 206.5 | 280.5  | 198.9 | 259.0 |
| Cd2     | 414.7      | 359.3 | 384.1 | 410.3  | 288.4 | 418.7 |
| Ccr9    | 67.1       | 57.0  | 64.4  | 132.9  | 160.4 | 138.4 |
| Gsn     | 33.9       | 33.7  | 32.6  | 51.0   | 39.7  | 58.1  |
| Tspan13 | 138.5      | 112.8 | 136.5 | 227.9  | 198.0 | 263.3 |
| Lztfl1  | 14.5       | 13.2  | 12.5  | 26.5   | 21.1  | 26.7  |
| Zcchc12 | 0.5        | 0.2   | 0.7   | 1.8    | 1.4   | 1.7   |
| Tnfrsf4 | 0.5        | 0.4   | 0.4   | 2.2    | 0.6   | 0.9   |
| Cd24a   | 5.9        | 4.9   | 5.5   | 1.9    | 1.5   | 3.1   |
| Gpr83   | 0.5        | 0.2   | 0.7   | 1.4    | 1.0   | 0.4   |

Appendix Figure S1
